# Supplementary material for: Comprehensive genome-wide analysis reveals different classes of enigmatic old yellow enzyme in fungi
Source: PubMed Central journal article supplement — Sci Rep. 2014 Feb 6;4:4013. doi: 10.1038/srep04013 (PMC3915301; doi:10.1038/srep04013), 2014-02-06
Supplement: srep04013-s1.pdf [file srep04013-s1.pdf]

**Comprehensive genome-wide analysis reveals different classes of enigmatic old yellow enzyme in fungi**

Shadab Nizam<sup>1</sup>, Sandhya Verma<sup>1</sup>, Nilam Nayan Borah<sup>1</sup>, Rajesh Kumar Gazara<sup>1</sup> and Praveen Kumar Verma<sup>1</sup>,

<sup>1</sup> National Institute of Plant Genome Research, Aruna Asaf Ali Marg, New Delhi-110067, India.

Supplementary Table S1. List of previously reported OYEs used as query sequences in this study.

| <b>S. No.</b> | <b>OYE</b> | <b>Accession number</b> | <b>Organism</b>                            |
|---------------|------------|-------------------------|--------------------------------------------|
| 1.            | OYE1       | Q02899.3                | <i>Saccharomyces pastorianus</i>           |
| 2.            | OYE2       | NP_012049.1             | <i>Saccharomyces cerevisiae</i>            |
| 3.            | OYE3       | NP_015154.1             | -do-                                       |
| 4.            | KYE1       | XP_451397.1             | <i>Kluyveromyces lactis</i>                |
| 5.            | HYE1       | AAN09952.1              | <i>Hansenula polymorpha</i>                |
| 6.            | HYE2       | AAN09953.1              | -do-                                       |
| 7.            | HYE3       | AAN09954.1              | -do-                                       |
| 8.            | PsOYE1     | XP_001384055.1          | <i>Pichia stipites</i>                     |
| 9.            | SYE1       | NP_718044.1             | <i>Shewanella oneidensis</i>               |
| 10.           | SYE2       | NP_718043.1             | -do-                                       |
| 11.           | SYE3       | NP_719682.1             | -do-                                       |
| 12.           | SYE4       | NP_718946.1             | -do-                                       |
| 13.           | AtOPR      | CAA71627.1              | <i>Arabidopsis thaliana</i>                |
| 14.           | LeOPR      | NP_001234781.1          | <i>Solanum lycopersicum</i>                |
| 15.           | YqjM       | NP_390263.1             | <i>Bacillus subtilis</i>                   |
| 16.           | GkOYE      | YP_148185.1             | <i>Geobacillus kaustophilus</i>            |
| 17.           | TpOYE      | YP_001664021.1          | <i>Thermoanaerobacter pseudethanolicus</i> |
| 18.           | TsOYE      | YP_004203660.1          | <i>Thermus scotoductus</i>                 |
| 19.           | TtOYE      | YP_143423.1             | <i>Thermus thermophiles</i>                |
| 20.           | GmOYE      | YP_006721534.1          | <i>Geobacter metallireducens</i>           |
| 21.           | PpOYE      | NP_743414.1             | <i>Pseudomonas putida</i>                  |

Supplementary Table S2. List of fungal species used in this comparative study.

| Species                                 | Class                  | Order                    | Lifestyle       | Genome size (Mb) | Number of genes |
|-----------------------------------------|------------------------|--------------------------|-----------------|------------------|-----------------|
| <i>Ascochyta rabiei</i>                 | <i>Dothideomycetes</i> | <i>Pleosporales</i>      | Necrotroph      | NA               | NA              |
| <i>Ashbya gossypii</i>                  | <i>Saccharomycetes</i> | <i>Saccharomycetales</i> | Biotroph        | 9.2              | 4,718           |
| <i>Aspergillus clavatus</i>             | <i>Eurotiomycetes</i>  | <i>Eurotiales</i>        | Animal pathogen | 27.86            | 9,121           |
| <i>Aspergillus flavus</i>               | <i>Eurotiomycetes</i>  | <i>Eurotiales</i>        | Necrotroph      | 36.79            | 12,604          |
| <i>Aspergillus fumigatus</i>            | <i>Eurotiomycetes</i>  | <i>Eurotiales</i>        | Animal pathogen | 29.38            | 9,887           |
| <i>Aspergillus nidulans</i>             | <i>Eurotiomycetes</i>  | <i>Eurotiales</i>        | Saprotroph      | 30.07            | 10,560          |
| <i>Aspergillus niger</i>                | <i>Eurotiomycetes</i>  | <i>Eurotiales</i>        | Saprotroph      | 37.2             | 11,200          |
| <i>Aspergillus oryzae</i>               | <i>Eurotiomycetes</i>  | <i>Eurotiales</i>        | Saprotroph      | 37.12            | 12,063          |
| <i>Aspergillus terreus</i>              | <i>Eurotiomycetes</i>  | <i>Eurotiales</i>        | Saprotroph      | 29.33            | 10,406          |
| <i>Baudoinia compniacensis</i>          | <i>Dothideomycetes</i> | <i>Capnodiales</i>       | Saprotroph      | 21.88            | 10,513          |
| <i>Botryotinia fuckeliana</i>           | <i>Leotiomycetes</i>   | <i>Helotiales</i>        | Necrotroph      | 38.8             | 13,664          |
| <i>Candida albicans</i>                 | <i>Saccharomycetes</i> | <i>Saccharomycetales</i> | Animal pathogen | 16               | 6,214           |
| <i>Candida glabrata</i>                 | <i>Saccharomycetes</i> | <i>Saccharomycetales</i> | Animal pathogen | 12.28            | 5,213           |
| <i>Chaetomium globosum</i>              | <i>Sordariomycetes</i> | <i>Sordariales</i>       | Saprotroph      | 34.89            | 11,124          |
| <i>Claviceps purpurea</i>               | <i>Sordariomycetes</i> | <i>Hypocreales</i>       | Biotroph        | NA               | NA              |
| <i>Coccidioides immitis</i>             | <i>Eurotiomycetes</i>  | <i>Onygenales</i>        | Animal pathogen | 28.95            | 9,757           |
| <i>Coccidioides posadasii</i>           | <i>Eurotiomycetes</i>  | <i>Onygenales</i>        | Animal pathogen | 27.58            | 10,225          |
| <i>Cochliobolus heterostrophus</i>      | <i>Dothideomycetes</i> | <i>Pleosporales</i>      | Necrotroph      | 36.46            | 13,336          |
| <i>Cochliobolus sativus</i>             | <i>Dothideomycetes</i> | <i>Pleosporales</i>      | Hemibiotroph    | 34.42            | 12,250          |
| <i>Cryptococcus gattii</i>              | <i>Tremellomycetes</i> | <i>Tremellales</i>       | Animal pathogen | 18.37            | 6,565           |
| <i>Cryptococcus neoformans</i>          | <i>Tremellomycetes</i> | <i>Tremellales</i>       | Animal pathogen | 18.87            | 6,967           |
| <i>Dothistroma septosporum</i>          | <i>Dothideomycetes</i> | <i>Capnodiales</i>       | Hemibiotroph    | 30.21            | 12,580          |
| <i>Fusarium graminearum</i>             | <i>Sordariomycetes</i> | <i>Hypocreales</i>       | Necrotroph      | 36.45            | 13,321          |
| <i>Fusarium oxysporum</i>               | <i>Sordariomycetes</i> | <i>Hypocreales</i>       | Hemibiotroph    | 61.36            | 17,708          |
| <i>Fusarium solani</i>                  | <i>Sordariomycetes</i> | <i>Hypocreales</i>       | Necrotroph      | 51.3             | 15,706          |
| <i>Fusarium verticillioides</i>         | <i>Sordariomycetes</i> | <i>Hypocreales</i>       | Hemibiotroph    | 41.78            | 15,869          |
| <i>Hansenula polymorpha</i>             | <i>Saccharomycetes</i> | <i>Saccharomycetales</i> | Animal pathogen | 9.5              | 5,933           |
| <i>Histoplasma capsulatum</i>           | <i>Eurotiomycetes</i>  | <i>Onygenales</i>        | Animal pathogen | 32.99            | 9,248           |
| <i>Kluyveromyces lactis</i>             | <i>Saccharomycetes</i> | <i>Saccharomycetales</i> | Saprotroph      | 10.6             | 5,329           |
| <i>Laccaria bicolor</i>                 | <i>Agaricomycetes</i>  | <i>Agaricales</i>        | Symbiont        | 64.9             | 20,614          |
| <i>Leptosphaeria maculans</i>           | <i>Dothideomycetes</i> | <i>Pleosporales</i>      | Hemibiotroph    | 44.89            | 12,469          |
| <i>Macrophomina phaseolina</i>          | <i>Dothideomycetes</i> | <i>Botryosphaerales</i>  | Necrotroph      | 49               | 14,249          |
| <i>Magnaporthe oryzae</i>               | <i>Sordariomycetes</i> | <i>Magnaporthales</i>    | Hemibiotroph    | 39.4             | 12,841          |
| <i>Mycosphaerella fijiensis</i>         | <i>Dothideomycetes</i> | <i>Capnodiales</i>       | Hemibiotroph    | 74.14            | 13,107          |
| <i>Mycosphaerella graminicola</i>       | <i>Dothideomycetes</i> | <i>Capnodiales</i>       | Hemibiotroph    | 39.69            | 10,933          |
| <i>Mycosphaerella populorum</i>         | <i>Dothideomycetes</i> | <i>Capnodiales</i>       | Hemibiotroph    | 29.35            | 10,233          |
| <i>Neosartorya fischeri</i>             | <i>Eurotiomycetes</i>  | <i>Eurotiales</i>        | Animal pathogen | 32.55            | 10,406          |
| <i>Neurospora crassa</i>                | <i>Sordariomycetes</i> | <i>Sordariales</i>       | Saprotroph      | 41.04            | 9,730           |
| <i>Paracoccidioides brasiliensis</i>    | <i>Eurotiomycetes</i>  | <i>Onygenales</i>        | Animal pathogen | 30.0             | 8,741           |
| <i>Penicillium chrysogenum</i>          | <i>Eurotiomycetes</i>  | <i>Eurotiales</i>        | Saprotroph      | 32.19            | 12,943          |
| <i>Penicillium digitatum</i>            | <i>Eurotiomycetes</i>  | <i>Eurotiales</i>        | Necrotroph      | 26               | 9,153           |
| <i>Penicillium marneffei</i>            | <i>Eurotiomycetes</i>  | <i>Eurotiales</i>        | Animal pathogen | 28.64            | 10,638          |
| <i>Pichia pastoris</i>                  | <i>Saccharomycetes</i> | <i>Saccharomycetales</i> | Saprotroph      | 9.43             | 5,313           |
| <i>Pichia stipitis</i>                  | <i>Saccharomycetes</i> | <i>Saccharomycetales</i> | Saprotroph      | 15.4             | 5,839           |
| <i>Piriformospora indica</i>            | <i>Agaricomycetes</i>  | <i>Sebacinales</i>       | Symbiont        | 24.98            | 11,769          |
| <i>Puccinia graminis f. sp. tritici</i> | <i>Urediniomycetes</i> | <i>Uredinales</i>        | Biotroph        | 88.64            | 15,800          |
| <i>Pyrenophora teres f. teres</i>       | <i>Dothideomycetes</i> | <i>Pleosporales</i>      | Necrotroph      | 33.58            | 11,799          |
| <i>Pyrenophora tritici-repentis</i>     | <i>Dothideomycetes</i> | <i>Pleosporales</i>      | Necrotroph      | 37.84            | 12,141          |

|                                  |                              |                                |              |       |        |
|----------------------------------|------------------------------|--------------------------------|--------------|-------|--------|
| <i>Rhizoctonia solani</i>        | <i>Agaricomycetes</i>        | <i>Cantharellales</i>          | Necrotroph   | 36.94 | 10,489 |
| <i>Rhodosporidium toruloides</i> | <i>Ustilaginomycetes</i>     | <i>Ustilaginales</i>           | Saprotroph   | 20.2  | 8,171  |
| <i>Saccharomyces cerevisiae</i>  | <i>Saccharomycetes</i>       | <i>Saccharomycetales</i>       | Saprotroph   | 12.2  | 6,692  |
| <i>Schizosaccharomyces pombe</i> | <i>Schizosaccharomycetes</i> | <i>Schizosaccharomycetales</i> | Saprotroph   | 12.5  | 5,058  |
| <i>Sclerotinia sclerotiorum</i>  | <i>Leotiomycetes</i>         | <i>Helotiales</i>              | Necrotroph   | 38.0  | 11,860 |
| <i>Setosphaeria turcica</i>      | <i>Dothideomycetes</i>       | <i>Pleosporales</i>            | Hemibiotroph | 43.01 | 11,702 |
| <i>Stagonospora nodorum</i>      | <i>Dothideomycetes</i>       | <i>Pleosporales</i>            | Necrotroph   | 37.21 | 12,380 |
| <i>Trichoderma atroviride</i>    | <i>Sordariomycetes</i>       | <i>Hypocreales</i>             | Saprotroph   | 36.1  | 11,100 |
| <i>Trichoderma reesei</i>        | <i>Sordariomycetes</i>       | <i>Hypocreales</i>             | Saprotroph   | 33.9  | 9,129  |
| <i>Trichoderma virens</i>        | <i>Sordariomycetes</i>       | <i>Hypocreales</i>             | Saprotroph   | 38.8  | 11,643 |
| <i>Ustilago hordei</i>           | <i>Ustilaginomycetes</i>     | <i>Ustilaginales</i>           | Biotroph     | 26.1  | 7,113  |
| <i>Ustilago maydis</i>           | <i>Ustilaginomycetes</i>     | <i>Ustilaginales</i>           | Biotroph     | 19.8  | 6,786  |

Supplementary Table S3. List of primers used to amplify genes needed for gene expression analyses.

| <b>Primer name</b> | <b>Forward primer (5'-3')</b> | <b>Reverse primer (5'-3')</b> |
|--------------------|-------------------------------|-------------------------------|
| ArOYE1-RT          | CCGACTACCCATTTAGCGAAGA        | CTGAACGCCATACTGATGCAA         |
| ArOYE2-RT          | GACAGAAGAGGAAGGTTATACGGACTA   | ATCCCTCTAATTTATACCGACCTTGA    |
| ArOYE3-RT          | ACAACGCAGTCCCCAAGCT           | TTCGGCAGGTCTGGATTTG           |
| ArOYE4-RT          | CTGTCCGGCTCCATCACCAA          | AACATGCGACCGACAAAAGC          |
| ArOYE5-RT          | GTGCGGTTCCCGAAGCT             | ATCATCGTGTATCTATCCATCTAGCATT  |
| ArOYE6-RT          | GCCACCGACGAGGACATT            | CTGGGCTGCGTGGACAA             |
| ArEF1 $\alpha$ -RT | GATCACTTTTTTCGGTCGTTTGT       | CTTCGTTCCACCAGACCGTAA         |

ArOYE: *Ascochyta rabiei* Old Yellow Enzyme, ArEF1 $\alpha$ : *Ascochyta rabiei* Elongation factor1- $\alpha$

Supplementary Table S4. List of OYE genes identified from 60 fungal species along with their corresponding nomenclature, HMM score, protein sequence ID, Class, protein length and sub-cellular localization.

| S.No. | Species                      | OYEs     | Score | Sequence ID    | OYE Class | Amino acid length | Sub-cellular localization |
|-------|------------------------------|----------|-------|----------------|-----------|-------------------|---------------------------|
| 1.    | <i>Ascochyta rabiei</i>      | ArOYE1   | 385.2 | KF644454       | I         | 367               | Cytoplasm                 |
|       |                              | ArOYE2   | 348.6 | KF644455       | I         | 384               | Mitochondria              |
|       |                              | ArOYE3   | 357.2 | KF644456       | I         | 412               | Cytoplasm                 |
|       |                              | ArOYE4   | 382   | KF644457       | II        | 425               | Cytoplasm                 |
|       |                              | ArOYE5   | 340.5 | KF644458       | II        | 473               | Cytoplasm                 |
|       |                              | ArOYE6   | 728.5 | KF644459       | III       | 448               | Cytoplasm                 |
| 2.    | <i>Ashbya gossypii</i>       | AgOYE1   | 552.3 | NP_986995.1    | I         | 399               | Mitochondria              |
| 3.    | <i>Aspergillus clavatus</i>  | AcOYE1   | 390.7 | XP_001272777.1 | I         | 402               | Cytoplasm                 |
|       |                              | AcOYE2   | 289.2 | XP_001274702.1 | I         | 415               | Cytoplasm                 |
|       |                              | AcOYE3   | 353.9 | XP_001276393.1 | II        | 442               | Mitochondria              |
|       |                              | AcOYE4   | 362.5 | XP_001272755.1 | II        | 421               | Cytoplasm                 |
|       |                              | AcOYE5   | 374.5 | XP_001273480.1 | II        | 422               | Cytoskeleton              |
|       |                              | AcOYE6   | 606.9 | XP_001269037.1 | III       | 444               | Mitochondria              |
|       |                              | AcOYE7   | 460.6 | XP_001267752.1 | III       | 427               | Mitochondria              |
| 4.    | <i>Aspergillus flavus</i>    | AfiOYE1  | 388.3 | XP_002373681.1 | I         | 370               | Mitochondria              |
|       |                              | AfiOYE2  | 348.6 | XP_002384860.1 | I         | 377               | Mitochondria              |
|       |                              | AfiOYE3  | 339.5 | XP_002379104.1 | I         | 385               | Mitochondria              |
|       |                              | AfiOYE4  | 232.5 | XP_002375082.1 | I         | 340               | Mitochondria              |
|       |                              | AfiOYE5  | 288.6 | XP_002380161.1 | I         | 408               | Cytoplasm                 |
|       |                              | AfiOYE6  | 376.6 | XP_002375947.1 | II        | 439               | Cytoplasm                 |
|       |                              | AfiOYE7  | 370.1 | XP_002376724.1 | II        | 413               | Cytoplasm                 |
|       |                              | AfiOYE8  | 386   | XP_002372644.1 | II        | 420               | Cytoplasm                 |
|       |                              | AfiOYE9  | 357.2 | XP_002379909.1 | II        | 456               | Cytoplasm                 |
|       |                              | AfiOYE10 | 372.7 | XP_002375111.1 | II        | 421               | Cytoplasm                 |
|       |                              | AfiOYE11 | 614.6 | XP_002384922.1 | III       | 444               | Cytoskeleton              |
|       |                              | AfiOYE12 | 435.9 | XP_002378137.1 | III       | 393               | Cytoplasm                 |
|       |                              | AfiOYE13 | 416.3 | XP_002375650.1 | III       | 417               | Mitochondria              |
|       |                              | AfiOYE14 | 263.1 | XP_002379925.1 | III       | 338               | Cytoskeleton              |
| 5.    | <i>Aspergillus fumigatus</i> | AfuOYE1  | 380.6 | XP_749538.1    | I         | 373               | Mitochondria              |
|       |                              | AfuOYE2  | 340.6 | XP_756133.1    | I         | 376               | Mitochondria              |
|       |                              | AfuOYE3  | 299.5 | XP_753224.1    | I         | 409               | Cytoplasm                 |
|       |                              | AfuOYE4  | 365.5 | XP_748197.1    | II        | 442               | Mitochondria              |
|       |                              | AfuOYE5  | 364.6 | XP_749564.1    | II        | 421               | Cytoplasm                 |
|       |                              | AfuOYE6  | 375.8 | XP_748868.1    | II        | 422               | Cytoplasm                 |
|       |                              | AfuOYE7  | 617.3 | XP_752589.1    | III       | 444               | Mitochondria              |
|       |                              | AfuOYE8  | 438.6 | XP_755160.1    | III       | 421               | Mitochondria              |
| 6.    | <i>Aspergillus nidulans</i>  | AndOYE1  | 369.5 | XP_661749.1    | I         | 349               | Mitochondria              |
|       |                              | AndOYE2  | 373.4 | XP_662832.1    | I         | 379               | Mitochondria              |
|       |                              | AndOYE3  | 381.8 | XP_682614.1    | I         | 410               | Mitochondria              |

|     |                                |          |       |                |     |     |                 |
|-----|--------------------------------|----------|-------|----------------|-----|-----|-----------------|
|     |                                | AndOYE4  | 341.7 | XP_682446.1    | I   | 388 | Cytoplasm       |
|     |                                | AndOYE5  | 291.3 | CBF84219.1     | I   | 412 | Cytoplasm       |
|     |                                | AndOYE6  | 359.9 | XP_657934.1    | II  | 435 | Cytoplasm       |
|     |                                | AndOYE7  | 375.1 | XP_664357.1    | II  | 422 | Cytoplasm       |
|     |                                | AndOYE8  | 366.5 | XP_659486.1    | II  | 421 | Cytoplasm       |
|     |                                | AndOYE9  | 487.8 | XP_663771.1    | III | 369 | Cytoskeleton    |
|     |                                |          |       |                |     |     |                 |
| 7.  | <i>Aspergillus niger</i>       | AngOYE1  | 365   | XP_001394816.2 | I   | 370 | Cytoplasm       |
|     |                                | AngOYE2  | 374.4 | XP_001393044.1 | I   | 369 | Cytoplasm       |
|     |                                | AngOYE3  | 322.5 | XP_001390054.1 | I   | 384 | Mitochondria    |
|     |                                | AngOYE4  | 283.8 | XP_001401198.1 | I   | 421 | Cytoplasm       |
|     |                                | AngOYE5  | 377.7 | XP_001389993.1 | II  | 420 | Cytoplasm       |
|     |                                | AngOYE6  | 366.1 | XP_001389551.2 | II  | 419 | Cytoplasm       |
|     |                                | AngOYE7  | 365.1 | CAK48758.1     | II  | 415 | Cytoplasm       |
|     |                                | AngOYE8  | 378   | XP_001399273.1 | II  | 421 | Cytoplasm       |
|     |                                | AngOYE9  | 353.6 | XP_001397404.1 | II  | 443 | Cytoplasm       |
|     |                                | AngOYE10 | 361.6 | XP_001391174.1 | II  | 422 | Cytoplasm       |
|     |                                | AngOYE11 | 450.9 | XP_001390672.2 | III | 412 | Mitochondria    |
|     |                                | AngOYE12 | 427.7 | XP_001395504.2 | III | 418 | Mitochondria    |
|     |                                |          |       |                |     |     |                 |
| 8.  | <i>Aspergillus oryzae</i>      | AoOYE1   | 391.7 | XP_001818449.1 | I   | 370 | Mitochondria    |
|     |                                | AoOYE2   | 380.8 | XP_001817710.1 | I   | 368 | Mitochondria    |
|     |                                | AoOYE3   | 343.5 | XP_001823674.2 | I   | 385 | Cytoplasm       |
|     |                                | AoOYE4   | 291.9 | BAE56743.1     | I   | 410 | Mitochondria    |
|     |                                | AoOYE5   | 287.6 | XP_001819457.2 | I   | 398 | Mitochondria    |
|     |                                | AoOYE6   | 288.6 | XP_001818745.2 | I   | 408 | Cytoplasm       |
|     |                                | AoOYE7   | 376.3 | XP_001727650.1 | II  | 439 | Cytoplasm       |
|     |                                | AoOYE8   | 386   | XP_001817541.1 | II  | 420 | Cytoplasm       |
|     |                                | AoOYE9   | 367.9 | XP_001820991.1 | II  | 413 | Cytoplasm       |
|     |                                | AoOYE10  | 358.6 | XP_001821546.2 | II  | 456 | Cytoplasm       |
|     |                                | AoOYE11  | 359.3 | BAE59544.1     | II  | 478 | Mitochondria    |
|     |                                | AoOYE12  | 615.7 | XP_001827676.1 | III | 444 | Cytoskeleton    |
|     |                                | AoOYE13  | 466.3 | BAE66156.1     | III | 409 | Cytoskeleton    |
|     |                                | AoOYE14  | 446.8 | XP_001827289.2 | III | 412 | Cytoskeleton    |
|     |                                | AoOYE15  | 466.2 | XP_001826449.2 | III | 418 | Cytoskeleton    |
|     |                                | AoOYE16  | 415.5 | XP_001727395.2 | III | 417 | Mitochondria    |
|     |                                | AoOYE17  | 403   | XP_001821534.1 | III | 376 | Cytoplasm       |
|     |                                |          |       |                |     |     |                 |
| 9.  | <i>Aspergillus terreus</i>     | AtOYE1   | 363   | XP_001217695.1 | I   | 367 | Cytoplasm       |
|     |                                | AtOYE2   | 355.9 | XP_001212002.1 | I   | 370 | Cytoplasm       |
|     |                                | AtOYE3   | 330.5 | XP_001211883.1 | I   | 365 | Mitochondria    |
|     |                                | AtOYE4   | 293.6 | XP_001217203.1 | I   | 344 | Mitochondria    |
|     |                                | AtOYE5   | 355.5 | XP_001218397.1 | II  | 443 | Mitochondria    |
|     |                                | AtOYE6   | 352.6 | XP_001215108.1 | II  | 425 | Nucleus         |
|     |                                | AtOYE7   | 368   | XP_001212014.1 | III | 399 | Plasma membrane |
|     |                                |          |       |                |     |     |                 |
| 10. | <i>Baudoinia compniacensis</i> | BcOYE1   | 408.1 | EMC94206.1     | I   | 375 | Cytoplasm       |
|     |                                | BcOYE2   | 342.7 | EMC92829.1     | I   | 359 | Cytoplasm       |
|     |                                | BcOYE3   | 335.4 | EMC93881.1     | I   | 373 | Cytoplasm       |
|     |                                | BcOYE4   | 379.7 | EMC99563.1     | II  | 424 | Cytoplasm       |
|     |                                | BcOYE5   | 687.8 | EMC99204.1     | III | 448 | Cytoplasm       |
|     |                                | BcOYE6   | 468.9 | EMC98898.1     | III | 459 | Cytoplasm       |

|     |                                    |         |       |                |     |     |              |
|-----|------------------------------------|---------|-------|----------------|-----|-----|--------------|
|     |                                    | BcOYE7  | 320.7 | EMC91925.1     | III | 481 | Cytoskeleton |
| 11. | <i>Botryotinia fuckeliana</i>      | BfOYE1  | 404.4 | XP_001558622.1 | I   | 373 | Cytoplasm    |
|     |                                    | BfOYE2  | 378.5 | XP_001556041.1 | I   | 413 | Cytoplasm    |
|     |                                    | BfOYE3  | 382.1 | XP_001558929.1 | II  | 432 | Cytoplasm    |
|     |                                    | BfOYE4  | 364.8 | XP_001554780.1 | II  | 439 | Mitochondria |
|     |                                    | BfOYE5  | 327.5 | XP_001548368.1 | II  | 365 | Cytoplasm    |
|     |                                    | BfOYE6  | 726.9 | XP_001547575.1 | III | 443 | Cytoplasm    |
|     |                                    | BfOYE7  | 325.6 | XP_001547383.1 | III | 335 | Cytoskeleton |
| 12. | <i>Candida albicans</i>            | CaOYE1  | 518.5 | XP_714056.1    | I   | 406 | Cytoplasm    |
|     |                                    | CaOYE2  | 536   | XP_716750.1    | I   | 402 | Cytoplasm    |
|     |                                    | CaOYE3  | 502.9 | XP_716740.1    | I   | 406 | Cytoplasm    |
|     |                                    | CaOYE4  | 511.6 | XP_716749.1    | I   | 413 | Cytoplasm    |
|     |                                    | CaOYE5  | 458.8 | XP_717925.1    | I   | 392 | Cytoplasm    |
|     |                                    | CaOYE6  | 454.1 | XP_715357.1    | I   | 392 | Cytoplasm    |
|     |                                    | CaOYE7  | 381.4 | XP_718652.1    | I   | 432 | Nucleus      |
|     |                                    | CaOYE8  | 313.9 | XP_715510.1    | II  | 432 | Cytoplasm    |
|     |                                    | CaOYE9  | 260.9 | XP_713846.1    | II  | 369 | Nucleus      |
| 13. | <i>Candida glabrata</i>            | CgOYE1  | 646.8 | XP_447339.1    | I   | 400 | Cytoplasm    |
|     |                                    | CgOYE2  | 674.5 | XP_447364.1    | I   | 401 | Cytoplasm    |
|     |                                    | CgOYE3  | 611.9 | XP_448689.1    | I   | 400 | Cytoplasm    |
|     |                                    | CgOYE4  | 616.3 | XP_449187.1    | I   | 400 | Cytoplasm    |
|     |                                    | CgOYE5  | 236.5 | XP_448473.1    | II  | 388 | Cytoplasm    |
| 14. | <i>Chaetomium globosum</i>         | ChgOYE1 | 287.7 | XP_001223431.1 | I   | 356 | Cytoplasm    |
|     |                                    | ChgOYE2 | 389.4 | XP_001220253.1 | II  | 433 | Mitochondria |
|     |                                    | ChgOYE3 | 380.7 | XP_001228015.1 | II  | 423 | Cytoplasm    |
| 15. | <i>Claviceps purpurea</i>          | ClpOYE1 | 335.9 | AET79178.1     | I   | 380 | Mitochondria |
|     |                                    | ClpOYE2 | 275.9 | CCE31526.1     | I   | 432 | Cytoplasm    |
|     |                                    | ClpOYE3 | 305.8 | CCE30765.1     | II  | 424 | Cytoplasm    |
|     |                                    | ClpOYE4 | 430.7 | CCE32902.1     | III | 410 | Cytoplasm    |
| 16. | <i>Coccidioides immitis</i>        | CiOYE1  | 285.1 | XP_001247988.1 | I   | 422 | Mitochondria |
|     |                                    | CiOYE2  | 373.6 | XP_001247544.1 | II  | 424 | Cytoplasm    |
| 17. | <i>Coccidioides posadasii</i>      | CpOYE1  | 251.8 | EFW13419.1     | I   | 397 | Mitochondria |
|     |                                    | CpOYE2  | 375.4 | EFW21715.1     | II  | 424 | Cytoplasm    |
| 18. | <i>Cochliobolus heterostrophus</i> | ChOYE1  | 306.9 | EMD89016.1     | I   | 365 | Cytoplasm    |
|     |                                    | ChOYE2  | 344.5 | EMD91314.1     | I   | 359 | Mitochondria |
|     |                                    | ChOYE3  | 402.8 | EMD88631.1     | II  | 434 | Peroxisome   |
|     |                                    | ChOYE4  | 349.8 | EMD91295.1     | II  | 464 | Cytoplasm    |
|     |                                    | ChOYE5  | 644.4 | EMD87349.1     | III | 446 | Cytoplasm    |
| 19. | <i>Cochliobolus sativus</i>        | CsOYE1  | 337.8 | EMD58472.1     | I   | 369 | Mitochondria |
|     |                                    | CsOYE2  | 403.1 | EMD64475.1     | II  | 434 | Peroxisome   |
|     |                                    | CsOYE3  | 349   | EMD58448.1     | II  | 464 | Cytoplasm    |
|     |                                    | CsOYE4  | 650.7 | EMD59455.1     | III | 447 | Cytoplasm    |



|     |                                |         |       |                |     |     |               |
|-----|--------------------------------|---------|-------|----------------|-----|-----|---------------|
| 20. | <i>Cryptococcus gattii</i>     | CrgOYE1 | 339.1 | XP_003195791.1 | I   | 393 | Cytoplasm     |
|     |                                | CrgOYE2 | 260.1 | XP_003196956.1 | I   | 416 | Cytoplasm     |
|     |                                | CrgOYE3 | 238.1 | XP_003193576.1 | I   | 383 | Cytoplasm     |
|     |                                | CrgOYE4 | 379   | XP_003191968.1 | II  | 459 | Cytoplasm     |
| 21. | <i>Cryptococcus neoformans</i> | CnOYE1  | 271.1 | XP_572706.1    | I   | 393 | Cytoplasm     |
|     |                                | CnOYE2  | 335.6 | XP_572301.1    | I   | 427 | Cytoplasm     |
|     |                                | CnOYE3  | 234.7 | XP_570269.1    | I   | 383 | Mitochondria  |
|     |                                | CnOYE4  | 376.7 | XP_566607.1    | II  | 459 | Cytoplasm     |
| 22. | <i>Dothistroma septosporum</i> | DsOYE1  | 397.3 | EME41543.1     | I   | 384 | Mitochondria  |
|     |                                | DsOYE2  | 333.9 | EME43066.1     | I   | 410 | Cytoplasm     |
|     |                                | DsOYE3  | 297.5 | EME43152.1     | I   | 354 | Cytoplasm     |
|     |                                | DsOYE4  | 379.8 | EME49641.1     | II  | 436 | Cytoplasm     |
|     |                                | DsOYE5  | 346.7 | EME40738.1     | II  | 447 | Mitochondria  |
|     |                                | DsOYE6  | 306.6 | EME43711.1     | II  | 441 | Cytoplasm     |
|     |                                | DsOYE7  | 675.3 | EME49464.1     | III | 448 | Cytoplasm     |
|     |                                | DsOYE8  | 464.9 | EME45535.1     | III | 453 | Cytoplasm     |
|     |                                | DsOYE9  | 326   | EME43373.1     | III | 484 | Mitochondria  |
| 23. | <i>Fusarium graminearum</i>    | FgOYE1  | 382.3 | XP_380241.1    | I   | 366 | Cytoskeleton  |
|     |                                | FgOYE2  | 372.2 | XP_383438.1    | I   | 369 | Mitochondria  |
|     |                                | FgOYE3  | 370.1 | XP_383531.1    | I   | 397 | Cytoplasm     |
|     |                                | FgOYE4  | 245   | XP_389988.1    | I   | 332 | Extracellular |
|     |                                | FgOYE5  | 339   | XP_383386.1    | I   | 379 | Mitochondria  |
|     |                                | FgOYE6  | 293   | XP_388018.1    | I   | 408 | Cytoplasm     |
|     |                                | FgOYE7  | 410.9 | XP_381422.1    | II  | 413 | Mitochondria  |
|     |                                | FgOYE8  | 372.3 | XP_388253.1    | II  | 413 | Cytoplasm     |
|     |                                | FgOYE9  | 388   | XP_389860.1    | II  | 426 | Cytoplasm     |
|     |                                | FgOYE10 | 372   | XP_380250.1    | II  | 442 | Cytoplasm     |
|     |                                | FgOYE11 | 376   | XP_386704.1    | II  | 452 | Mitochondria  |
|     |                                | FgOYE12 | 631.5 | XP_383886.1    | III | 450 | Cytoplasm     |
|     |                                | FgOYE13 | 519.5 | XP_384188.1    | III | 446 | Cytoplasm     |
|     |                                | FgOYE14 | 411.6 | XP_384931.1    | III | 411 | Cytoplasm     |
|     |                                | FgOYE15 | 417.4 | XP_390626.1    | III | 409 | Mitochondria  |
| 24. | <i>Fusarium oxysporum</i>      | FoOYE1  | 362.1 | EGU88302.1     | I   | 370 | Mitochondria  |
|     |                                | FoOYE2  | 354.9 | EMT72633.1     | I   | 351 | Cytoplasm     |
|     |                                | FoOYE3  | 319.2 | EMT71554.1     | I   | 345 | Cytoplasm     |
|     |                                | FoOYE4  | 361.9 | ENH74399.1     | I   | 383 | Mitochondria  |
|     |                                | FoOYE5  | 328.9 | ENH65629.1     | I   | 364 | Mitochondria  |
|     |                                | FoOYE6  | 321.5 | EMT68747.1     | I   | 362 | Mitochondria  |
|     |                                | FoOYE7  | 357.4 | EMT71362.1     | I   | 397 | Mitochondria  |
|     |                                | FoOYE8  | 336.4 | EMT62821.1     | I   | 416 | Cytoplasm     |
|     |                                | FoOYE9  | 290.6 | EMT66576.1     | I   | 408 | Cytoplasm     |
|     |                                | FoOYE10 | 413.5 | EMT66832.1     | II  | 413 | Cytoplasm     |
|     |                                | FoOYE11 | 397.5 | EMT60475.1     | II  | 415 | Cytoplasm     |
|     |                                | FoOYE12 | 381.9 | EMT64308.1     | II  | 451 | Cytoplasm     |
|     |                                | FoOYE13 | 376.1 | EMT67619.1     | II  | 421 | Mitochondria  |
|     |                                | FoOYE14 | 375.2 | EMT71732.1     | II  | 458 | Cytoplasm     |

|            |                                        |         |       |                |     |     |              |
|------------|----------------------------------------|---------|-------|----------------|-----|-----|--------------|
|            |                                        | FoOYE15 | 630.8 | EMT71216.1     | III | 450 | Cytoplasm    |
|            |                                        | FoOYE16 | 532.7 | EMT70547.1     | III | 451 | Cytoplasm    |
|            |                                        | FoOYE17 | 480.6 | EMT65783.1     | III | 436 | Cytoplasm    |
|            |                                        | FoOYE18 | 376.5 | EMT72012.1     | III | 415 | Cytoplasm    |
|            |                                        | FoOYE19 | 397.9 | EMT74453.1     | III | 383 | Mitochondria |
|            |                                        | FoOYE20 | 423.1 | EMT63134.1     | III | 409 | Mitochondria |
|            |                                        | FoOYE21 | 318.7 | EMT71670.1     | III | 403 | Mitochondria |
|            |                                        |         |       |                |     |     |              |
| <b>25.</b> | <b><i>Fusarium solani</i></b>          | FsOYE1  | 390.9 | XP_003040617.1 | I   | 367 | Mitochondria |
|            |                                        | FsOYE2  | 390.6 | XP_003043600.1 | I   | 365 | Cytoplasm    |
|            |                                        | FsOYE3  | 391.1 | XP_003046890.1 | I   | 386 | Cytoplasm    |
|            |                                        | FsOYE4  | 337.5 | XP_003046052.1 | I   | 375 | Mitochondria |
|            |                                        | FsOYE5  | 353.9 | XP_003047418.1 | I   | 368 | Mitochondria |
|            |                                        | FsOYE6  | 343.2 | XP_003049050.1 | I   | 361 | Mitochondria |
|            |                                        | FsOYE7  | 361.9 | XP_003047276.1 | I   | 391 | Mitochondria |
|            |                                        | FsOYE8  | 344.4 | XP_003043831.1 | I   | 394 | Cytoplasm    |
|            |                                        | FsOYE9  | 333.5 | XP_003040921.1 | I   | 413 | Cytoplasm    |
|            |                                        | FsOYE10 | 281.9 | XP_003047281.1 | I   | 407 | Cytoplasm    |
|            |                                        | FsOYE11 | 169.1 | XP_003043159.1 | I   | 368 | Cytoplasm    |
|            |                                        | FsOYE12 | 416.3 | XP_003053408.1 | II  | 444 | Cytoplasm    |
|            |                                        | FsOYE13 | 370.5 | XP_003043011.1 | II  | 411 | Cytoplasm    |
|            |                                        | FsOYE14 | 374.5 | XP_003049114.1 | II  | 409 | Cytoplasm    |
|            |                                        | FsOYE15 | 376.2 | XP_003045875.1 | II  | 416 | Cytoplasm    |
|            |                                        | FsOYE16 | 371.4 | XP_003040465.1 | II  | 407 | Cytoskeleton |
|            |                                        | FsOYE17 | 366.8 | XP_003049535.1 | II  | 455 | Cytoplasm    |
|            |                                        | FsOYE18 | 554.7 | XP_003047330.1 | III | 437 | Cytoplasm    |
|            |                                        | FsOYE19 | 541.4 | XP_003044944.1 | III | 453 | Mitochondria |
|            |                                        | FsOYE20 | 512.4 | XP_003042155.1 | III | 429 | Cytoplasm    |
|            |                                        | FsOYE21 | 415.4 | XP_003043112.1 | III | 411 | Mitochondria |
|            |                                        | FsOYE22 | 421.4 | XP_003054679.1 | III | 412 | Mitochondria |
|            |                                        |         |       |                |     |     |              |
| <b>26.</b> | <b><i>Fusarium verticillioides</i></b> | FvOYE1  | 371.5 | FVEG_10034     | I   | 370 | Cytoskeleton |
|            |                                        | FvOYE2  | 390.6 | FVEG_00100     | I   | 368 | Mitochondria |
|            |                                        | FvOYE3  | 368.3 | FVEG_08460     | I   | 386 | Mitochondria |
|            |                                        | FvOYE4  | 362.7 | FVEG_08535     | I   | 370 | Mitochondria |
|            |                                        | FvOYE5  | 340.1 | FVEG_06429     | I   | 375 | Cytoplasm    |
|            |                                        | FvOYE6  | 343.4 | FVEG_05741     | I   | 373 | Mitochondria |
|            |                                        | FvOYE7  | 288.2 | FVEG_10591     | I   | 356 | Mitochondria |
|            |                                        | FvOYE8  | 356.9 | FVEG_08619     | I   | 398 | Mitochondria |
|            |                                        | FvOYE9  | 334.5 | FVEG_11005     | I   | 416 | Cytoplasm    |
|            |                                        | FvOYE10 | 287   | FVEG_07175     | I   | 408 | Cytoplasm    |
|            |                                        | FvOYE11 | 413.8 | FVEG_01376     | II  | 413 | Cytoplasm    |
|            |                                        | FvOYE12 | 396.1 | FVEG_06291     | II  | 415 | Cytoplasm    |
|            |                                        | FvOYE13 | 381.8 | FVEG_05618     | II  | 451 | Cytoplasm    |
|            |                                        | FvOYE14 | 357.2 | FVEG_12306     | II  | 421 | Cytoplasm    |
|            |                                        | FvOYE15 | 324.4 | FVEG_11755     | II  | 437 | Cytoplasm    |
|            |                                        | FvOYE16 | 632.5 | FVEG_08742     | III | 450 | Cytoplasm    |
|            |                                        | FvOYE17 | 521.4 | FVEG_09300     | III | 452 | Cytoplasm    |
|            |                                        | FvOYE18 | 522.3 | FVEG_10181     | III | 448 | Cytoplasm    |
|            |                                        | FvOYE19 | 420.6 | FVEG_09981     | III | 409 | Cytoplasm    |
|            |                                        | FvOYE20 | 425.5 | FVEG_03185     | III | 409 | Mitochondria |
|            |                                        | FvOYE21 | 351.7 | FVEG_08332     | III | 405 | Mitochondria |

|     |                                   |         |       |                |     |     |              |
|-----|-----------------------------------|---------|-------|----------------|-----|-----|--------------|
|     |                                   | FvOYE2  | 115.6 | FVEG_08314     | III | 314 | Mitochondria |
| 27. | <i>Hansenula polymorpha</i>       | HpOYE1  | 669.8 | AAN09952.1     | I   | 401 | Cytoplasm    |
|     |                                   | HpOYE2  | 688.4 | AAN09954.1     | I   | 402 | Cytoplasm    |
|     |                                   | HpOYE3  | 688.4 | AAN09953.1     | I   | 402 | Cytoplasm    |
| 28. | <i>Histoplasma capsulatus</i>     | HcOYE1  | 358.3 | XP_001538118.1 | II  | 420 | Cytoplasm    |
| 29. | <i>Kluyveromyces lactis</i>       | KIOYE1  | 678.7 | XP_451397.1    | I   | 398 | Cytoplasm    |
|     |                                   | KIOYE2  | 279.8 | XP_452270.1    | II  | 409 | Cytoplasm    |
| 30. | <i>Laccaria bicolor</i>           | LbOYE1  | 371   | XP_001886261.1 | I   | 373 | Mitochondria |
|     |                                   | LbOYE2  | 368.7 | XP_001886575.1 | I   | 384 | Mitochondria |
|     |                                   | LbOYE3  | 228.7 | XP_001889520.1 | I   | 374 | Cytoplasm    |
|     |                                   | LbOYE4  | 218.2 | XP_001885579.1 | I   | 378 | Cytoplasm    |
|     |                                   | LbOYE5  | 408.5 | XP_001881077.1 | II  | 415 | Cytoplasm    |
| 31. | <i>Leptosphaeria maculans</i>     | LmOYE1  | 334   | XP_003839270.1 | I   | 444 | Mitochondria |
|     |                                   | LmOYE2  | 392.1 | XP_003839692.1 | II  | 430 | Peroxisome   |
|     |                                   | LmOYE3  | 344.3 | XP_003835675.1 | II  | 467 | Mitochondria |
|     |                                   | LmOYE4  | 659.8 | XP_003840432.1 | III | 449 | Cytoplasm    |
| 32. | <i>Macrophomina phaseolina</i>    | MpOYE1  | 361.7 | EKG18001.1     | I   | 332 | Cytoplasm    |
|     |                                   | MpOYE2  | 366.1 | EKG20624.1     | I   | 370 | Cytoplasm    |
|     |                                   | MpOYE3  | 376.2 | EKG17496.1     | I   | 348 | Cytoplasm    |
|     |                                   | MpOYE4  | 218.5 | EKG17706.1     | I   | 240 | Cytoskeleton |
|     |                                   | MpOYE5  | 357.3 | EKG21699.1     | I   | 399 | Cytoplasm    |
|     |                                   | MpOYE6  | 332.9 | EKG22108.1     | I   | 416 | Mitochondria |
|     |                                   | MpOYE7  | 205.4 | EKG13357.1     | I   | 403 | Cytoplasm    |
|     |                                   | MpOYE8  | 367.1 | EKG20918.1     | II  | 416 | Cytoplasm    |
|     |                                   | MpOYE9  | 358.6 | EKG11784.1     | II  | 429 | Cytoplasm    |
|     |                                   | MpOYE10 | 729.2 | EKG20669.1     | III | 446 | Cytoplasm    |
|     |                                   | MpOYE11 | 598.8 | EKG16952.1     | III | 453 | Cytoplasm    |
| 33. | <i>Magnaporthe oryzae</i>         | MoOYE1  | 336.6 | XP_003715783.1 | I   | 373 | Mitochondria |
|     |                                   | MoOYE2  | 286.4 | XP_003721368.1 | I   | 409 | Cytoplasm    |
|     |                                   | MoOYE3  | 405   | XP_003713598.1 | II  | 442 | Cytoplasm    |
|     |                                   | MoOYE4  | 694.8 | XP_003720070.1 | III | 417 | Cytoplasm    |
| 34. | <i>Mycosphaerella fijiensis</i>   | MfOYE1  | 377   | EME87822.1     | I   | 383 | Cytoplasm    |
|     |                                   | MfOYE2  | 375.9 | EME88727.1     | I   | 391 | Mitochondria |
|     |                                   | MfOYE3  | 346.9 | EME81724.1     | I   | 406 | Cytoplasm    |
|     |                                   | MfOYE4  | 375.7 | EME89616.1     | II  | 437 | Cytoplasm    |
|     |                                   | MfOYE5  | 373.3 | EME81169.1     | II  | 461 | Cytoplasm    |
|     |                                   | MfOYE6  | 679.1 | EME87367.1     | III | 448 | Cytoplasm    |
| 35. | <i>Mycosphaerella graminicola</i> | MgOYE1  | 365.5 | XP_003856408.1 | I   | 375 | Mitochondria |
|     |                                   | MgOYE2  | 292.2 | XP_003855430.1 | I   | 343 | Cytoplasm    |
|     |                                   | MgOYE3  | 316.6 | XP_003854988.1 | I   | 372 | Cytoplasm    |
|     |                                   | MgOYE4  | 308.3 | XP_003848998.1 | I   | 355 | Mitochondria |

|     |                                      |         |       |                |     |     |              |
|-----|--------------------------------------|---------|-------|----------------|-----|-----|--------------|
|     |                                      | MgOYE5  | 383.5 | XP_003853525.1 | II  | 424 | Cytoplasm    |
|     |                                      | MgOYE6  | 350.3 | XP_003849629.1 | II  | 452 | Cytoplasm    |
|     |                                      | MgOYE7  | 683.6 | XP_003856796.1 | III | 448 | Cytoplasm    |
|     |                                      | MgOYE8  | 441.1 | XP_003854564.1 | III | 456 | Cytoskeleton |
|     |                                      | MgOYE9  | 314.3 | XP_003854244.1 | III | 430 | Mitochondria |
|     |                                      |         |       |                |     |     |              |
| 36. | <i>Mycosphaerella populorum</i>      | MypOYE1 | 341.5 | EMF11974.1     | I   | 406 | Mitochondria |
|     |                                      | MypOYE2 | 342.3 | EMF12018.1     | I   | 400 | Cytoplasm    |
|     |                                      | MypOYE3 | 388.8 | EMF16473.1     | II  | 430 | Cytoplasm    |
|     |                                      | MypOYE4 | 339.1 | EMF09315.1     | II  | 452 | Cytoplasm    |
|     |                                      | MypOYE5 | 671.8 | EMF16976.1     | III | 445 | Cytoplasm    |
|     |                                      | MypOYE6 | 322.3 | EMF11720.1     | III | 481 | Cytoskeleton |
|     |                                      |         |       |                |     |     |              |
| 37. | <i>Neosartorya fischeri</i>          | NfOYE1  | 377.7 | XP_001260040.1 | I   | 368 | Mitochondria |
|     |                                      | NfOYE2  | 302.4 | XP_001259238.1 | I   | 408 | Cytoplasm    |
|     |                                      | NfOYE3  | 369.1 | XP_001266387.1 | II  | 442 | Mitochondria |
|     |                                      | NfOYE4  | 385.1 | XP_001261594.1 | II  | 422 | Cytoplasm    |
|     |                                      | NfOYE5  | 367.4 | XP_001260063.1 | II  | 421 | Cytoplasm    |
|     |                                      | NfOYE6  | 618.5 | XP_001264538.1 | III | 444 | Mitochondria |
|     |                                      | NfOYE7  | 458.3 | XP_001260337.1 | III | 421 | Mitochondria |
|     |                                      |         |       |                |     |     |              |
| 38. | <i>Neurospora crassa</i>             | NcOYE1  | 395.6 | XP_955910.1    | I   | 379 | Mitochondria |
|     |                                      | NcOYE2  | 414.5 | XP_964639.1    | II  | 434 | Cytoplasm    |
|     |                                      | NcOYE3  | 593   | XP_958838.1    | III | 437 | Mitochondria |
|     |                                      |         |       |                |     |     |              |
| 39. | <i>Paracoccidioides brasiliensis</i> | PbOYE1  | 352.2 | EEH45369.1     | I   | 375 | Cytoplasm    |
|     |                                      | PbOYE2  | 357.6 | EEH16871.1     | I   | 394 | Cytoplasm    |
|     |                                      | PbOYE3  | 330.1 | EEH43640.1     | II  | 415 | Cytoplasm    |
|     |                                      |         |       |                |     |     |              |
| 40. | <i>Penicillium chrysogenum</i>       | PcOYE1  | 389.2 | XP_002563769.1 | I   | 367 | Cytoplasm    |
|     |                                      | PcOYE2  | 364.8 | XP_002561471.1 | I   | 364 | Cytoplasm    |
|     |                                      | PcOYE3  | 367.4 | XP_002562456.1 | I   | 368 | Mitochondria |
|     |                                      | PcOYE4  | 257.6 | XP_002564652.1 | I   | 402 | Cytoplasm    |
|     |                                      | PcOYE5  | 387.7 | XP_002560972.1 | II  | 422 | Cytoplasm    |
|     |                                      | PcOYE6  | 352.1 | XP_002568438.1 | II  | 443 | Cytoplasm    |
|     |                                      | PcOYE7  | 382.6 | XP_002556925.1 | II  | 413 | Cytoplasm    |
|     |                                      | PcOYE8  | 598   | XP_002560444.1 | III | 444 | Cytoskeleton |
|     |                                      | PcOYE9  | 540.7 | XP_002560103.1 | III | 458 | Cytoplasm    |
|     |                                      | PcOYE10 | 426.1 | XP_002556645.1 | III | 413 | Mitochondria |
|     |                                      | PcOYE11 | 436.9 | XP_002558887.1 | III | 416 | Mitochondria |
|     |                                      |         |       |                |     |     |              |
| 41. | <i>Penicillium digitatum</i>         | PdOYE1  | 313.5 | EKV09666.1     | I   | 365 | Mitochondria |
|     |                                      | PdOYE2  | 337.5 | EKV16874.1     | I   | 385 | Cytoplasm    |
|     |                                      | PdOYE3  | 234   | EKV04694.1     | I   | 393 | Cytoplasm    |
|     |                                      | PdOYE4  | 391   | EKV18347.1     | II  | 422 | Cytoplasm    |
|     |                                      | PdOYE5  | 597.6 | EKV06611.1     | III | 444 | Cytoplasm    |
|     |                                      |         |       |                |     |     |              |
| 42. | <i>Penicillium marneffei</i>         | PmOYE1  | 379.9 | XP_002150574.1 | I   | 376 | Mitochondria |
|     |                                      | PmOYE2  | 399.6 | XP_002152521.1 | I   | 364 | Mitochondria |
|     |                                      | PmOYE3  | 352.6 | XP_002144880.1 | I   | 385 | Mitochondria |

|     |                                     |         |       |                |     |     |               |
|-----|-------------------------------------|---------|-------|----------------|-----|-----|---------------|
|     |                                     | PmOYE4  | 283.7 | XP_002145688.1 | I   | 409 | Cytoplasm     |
|     |                                     | PmOYE5  | 360.5 | XP_002149480.1 | II  | 454 | Cytoplasm     |
|     |                                     | PmOYE6  | 346.3 | XP_002147920.1 | II  | 423 | Cytoplasm     |
|     |                                     | PmOYE7  | 373   | XP_002144915.1 | II  | 422 | Cytoplasm     |
|     |                                     | PmOYE8  | 416   | XP_002151394.1 | III | 417 | Mitochondria  |
|     |                                     |         |       |                |     |     |               |
| 43. | <i>Pichia pastoris</i>              | PpOYE1  | 544.9 | XP_002492601.1 | I   | 409 | Cytoplasm     |
|     |                                     | PpOYE2  | 541.7 | XP_002492600.1 | I   | 409 | Cytoplasm     |
|     |                                     | PpOYE3  | 331.9 | XP_002490248.1 | II  | 402 | Cytoplasm     |
|     |                                     |         |       |                |     |     |               |
| 44. | <i>Pichia stipitis</i>              | PsOYE1  | 580.9 | XP_001385078.1 | I   | 406 | Cytoplasm     |
|     |                                     | PsOYE2  | 522.9 | XP_001383638.1 | I   | 404 | Mitochondria  |
|     |                                     | PsOYE3  | 537.2 | XP_001382344.1 | I   | 401 | Cytoplasm     |
|     |                                     | PsOYE4  | 554.2 | XP_001385076.2 | I   | 405 | Mitochondria  |
|     |                                     | PsOYE5  | 637.9 | XP_001384054.1 | I   | 406 | Cytoplasm     |
|     |                                     | PsOYE6  | 628.2 | XP_001384056.2 | I   | 407 | Cytoplasm     |
|     |                                     | PsOYE7  | 510.2 | XP_001385077.2 | I   | 403 | Mitochondria  |
|     |                                     | PsOYE8  | 620.3 | XP_001384116.1 | I   | 406 | Cytoplasm     |
|     |                                     | PsOYE9  | 647.3 | XP_001384055.1 | I   | 407 | Cytoplasm     |
|     |                                     | PsOYE10 | 328.7 | XP_001383472.2 | II  | 434 | Cytoplasm     |
|     |                                     | PsOYE11 | 334   | XP_001383637.2 | II  | 422 | Cytoplasm     |
|     |                                     |         |       |                |     |     |               |
| 45. | <i>Piriformospora indica</i>        | PiOYE1  | 405.8 | CCA71264.1     | I   | 365 | Cytoskeleton  |
|     |                                     | PiOYE2  | 411.4 | CCA71265.1     | I   | 366 | Mitochondria  |
|     |                                     | PiOYE3  | 413.8 | CCA70874.1     | II  | 417 | Cytoplasm     |
|     |                                     |         |       |                |     |     |               |
| 46. | <i>Puccinia graminis tritici</i>    | PgtOYE1 | 413.4 | XP_003322550.1 | III | 405 | Mitochondria  |
|     |                                     | PgtOYE2 | 366.4 | XP_003321709.2 | III | 402 | Cytoplasm     |
|     |                                     |         |       |                |     |     |               |
| 47. | <i>Pyrenophora tritici-repentis</i> | PtrOYE1 | 385.2 | XP_001938581.1 | I   | 366 | Cytoplasm     |
|     |                                     | PtrOYE2 | 297.9 | XP_001930843.1 | I   | 345 | Mitochondria  |
|     |                                     | PtrOYE3 | 337.9 | XP_001938029.1 | I   | 408 | Cytoplasm     |
|     |                                     | PtrOYE4 | 402.4 | XP_001936933.1 | II  | 434 | Cytoplasm     |
|     |                                     | PtrOYE5 | 331.5 | XP_001941724.1 | II  | 399 | Mitochondria  |
|     |                                     | PtrOYE6 | 663.1 | XP_001934295.1 | III | 449 | Cytoplasm     |
|     |                                     |         |       |                |     |     |               |
| 48. | <i>Pyrenophora teres teres</i>      | PttOYE1 | 371.7 | XP_003295711.1 | I   | 366 | Cytoplasm     |
|     |                                     | PttOYE2 | 251.4 | XP_003304545.1 | I   | 284 | Cytoplasm     |
|     |                                     | PttOYE3 | 340.3 | XP_003297182.1 | I   | 408 | Cytoplasm     |
|     |                                     | PttOYE4 | 403.4 | XP_003301552.1 | II  | 456 | Cytoplasm     |
|     |                                     | PttOYE5 | 200.3 | XP_003296488.1 | II  | 254 | Cytoplasm     |
|     |                                     | PttOYE6 | 662.5 | XP_003296539.1 | III | 449 | Cytoplasm     |
|     |                                     |         |       |                |     |     |               |
| 49. | <i>Rhizoctonia solani</i>           | RsOYE1  | 416.3 | ELU42401.1     | I   | 410 | Mitochondria  |
|     |                                     | RsOYE2  | 350.5 | ELU37570.1     | I   | 399 | Mitochondria  |
|     |                                     | RsOYE3  | 282.1 | ELU44178.1     | I   | 355 | Mitochondria  |
|     |                                     | RsOYE4  | 401   | ELU39655.1     | II  | 503 | Extracellular |
|     |                                     | RsOYE5  | 465.1 | ELU41063.1     | III | 450 | Cytoplasm     |
|     |                                     | RsOYE6  | 430   | ELU37947.1     | III | 440 | Cytoskeleton  |
|     |                                     |         |       |                |     |     |               |
| 50. | <i>Rhodosporidium</i>               | RtOYE1  | 399.2 | EMS24376.1     | I   | 374 | Mitochondria  |

|     |                                  |         |       |                |     |     |              |
|-----|----------------------------------|---------|-------|----------------|-----|-----|--------------|
|     | <i>toruloides</i>                |         |       |                |     |     |              |
|     |                                  | RtOYE2  | 377.9 | EMS23446.1     | II  | 452 | Cytoplasm    |
|     |                                  | RtOYE3  | 423.2 | EMS18823.1     | III | 427 | Cytoplasm    |
|     |                                  | RtOYE4  | 312.2 | EMS18357.1     | III | 437 | Cytoplasm    |
|     |                                  | RtOYE5  | 290.1 | EMS18551.1     | III | 515 | Cytoplasm    |
|     |                                  |         |       |                |     |     |              |
| 51. | <i>Saccharomyces cerevisiae</i>  | ScOYE1  | 712.7 | NP_012049.1    | I   | 400 | Cytoplasm    |
|     |                                  | ScOYE2  | 690.5 | NP_015154.1    | I   | 400 | Cytoplasm    |
|     |                                  |         |       |                |     |     |              |
| 52. | <i>Schizosaccharomyces pombe</i> | SpOYE1  | 296.3 | NP_592823.1    | I   | 392 | Cytoplasm    |
|     |                                  | SpOYE2  | 293.3 | NP_592817.1    | I   | 382 | Cytoplasm    |
|     |                                  | SpOYE3  | 402.7 | NP_595868.1    | II  | 395 | Cytoskeleton |
|     |                                  |         |       |                |     |     |              |
| 53. | <i>Sclerotinia sclerotiorum</i>  | SsOYE1  | 415.8 | XP_001597795.1 | I   | 373 | Mitochondria |
|     |                                  | SsOYE2  | 388.8 | XP_001595831.1 | II  | 409 | Cytoplasm    |
|     |                                  | SsOYE3  | 371.4 | XP_001585571.1 | II  | 435 | Mitochondria |
|     |                                  | SsOYE4  | 684.6 | XP_001598970.1 | III | 443 | Cytoplasm    |
|     |                                  | SsOYE5  | 361.5 | XP_001586962.1 | III | 344 | Cytoskeleton |
|     |                                  |         |       |                |     |     |              |
| 54. | <i>Setosphaeria turcica</i>      | StOYE1  | 387.1 | EOA82937.1     | I   | 366 | Cytoplasm    |
|     |                                  | StOYE2  | 302.7 | EOA81858.1     | I   | 358 | Mitochondria |
|     |                                  | StOYE3  | 338.1 | EOA88743.1     | I   | 414 | Cytoplasm    |
|     |                                  | StOYE4  | 404.5 | EOA88147.1     | II  | 455 | Cytoplasm    |
|     |                                  | StOYE5  | 327.2 | EOA81831.1     | II  | 401 | Mitochondria |
|     |                                  | StOYE6  | 661.7 | EOA86065.1     | III | 449 | Cytoplasm    |
|     |                                  |         |       |                |     |     |              |
| 55. | <i>Stagnospora nodorum</i>       | SnOYE1  | 385.5 | XP_001799909.1 | I   | 369 | Mitochondria |
|     |                                  | SnOYE2  | 383.4 | XP_001792787.1 | I   | 367 | Cytoplasm    |
|     |                                  | SnOYE3  | 296.5 | XP_001793205.1 | I   | 332 | Cytoplasm    |
|     |                                  | SnOYE4  | 340   | XP_001803927.1 | I   | 395 | Cytoplasm    |
|     |                                  | SnOYE5  | 307   | XP_001794614.1 | I   | 392 | Cytoplasm    |
|     |                                  | SnOYE6  | 388.9 | XP_001802700.1 | II  | 425 | Cytoplasm    |
|     |                                  | SnOYE7  | 236.4 | XP_001805280.1 | II  | 489 | Cytoplasm    |
|     |                                  | SnOYE8  | 659.4 | XP_001806580.1 | III | 449 | Cytoplasm    |
|     |                                  |         |       |                |     |     |              |
| 56. | <i>Trichoderma atroviride</i>    | TaOYE1  | 365.5 | EHK49303.1     | I   | 362 | Mitochondria |
|     |                                  | TaOYE2  | 382.3 | EHK43606.1     | I   | 368 | Cytoskeleton |
|     |                                  | TaOYE3  | 358.7 | EHK49437.1     | I   | 365 | Cytoplasm    |
|     |                                  | TaOYE4  | 371.3 | EHK50809.1     | I   | 371 | Cytoskeleton |
|     |                                  | TaOYE5  | 350.8 | EHK42252.1     | I   | 384 | Mitochondria |
|     |                                  | TaOYE6  | 353.8 | EHK50404.1     | I   | 383 | Cytoplasm    |
|     |                                  | TaOYE7  | 341.4 | EHK44334.1     | I   | 374 | Cytoplasm    |
|     |                                  | TaOYE8  | 306.5 | EHK42728.1     | I   | 407 | Cytoplasm    |
|     |                                  | TaOYE9  | 265.7 | EHK41134.1     | I   | 374 | Cytoplasm    |
|     |                                  | TaOYE10 | 289.8 | EHK40486.1     | I   | 411 | Cytoplasm    |
|     |                                  | TaOYE11 | 409.1 | EHK45545.1     | II  | 417 | Cytoplasm    |
|     |                                  | TaOYE12 | 381.3 | EHK42431.1     | II  | 459 | Cytoplasm    |
|     |                                  | TaOYE13 | 371.8 | EHK45467.1     | II  | 458 | Mitochondria |
|     |                                  | TaOYE14 | 368.9 | EHK41164.1     | II  | 415 | Cytoskeleton |
|     |                                  | TaOYE15 | 328   | EHK46788.1     | II  | 370 | Cytoplasm    |

|            |                                  |         |       |             |     |     |              |
|------------|----------------------------------|---------|-------|-------------|-----|-----|--------------|
|            |                                  | TaOYE16 | 567.5 | EHK49477.1  | III | 438 | Cytoplasm    |
|            |                                  | TaOYE17 | 423.4 | EHK49302.1  | III | 405 | Cytoskeleton |
|            |                                  |         |       |             |     |     |              |
| <b>57.</b> | <b><i>Trichoderma reesei</i></b> | TrOYE1  | 352   | EGR52964.1  | I   | 363 | Mitochondria |
|            |                                  | TrOYE2  | 295.9 | EGR49960.1  | I   | 410 | Cytoplasm    |
|            |                                  | TrOYE3  | 413.2 | EGR47783.1  | II  | 415 | Cytoplasm    |
|            |                                  | TrOYE4  | 362.5 | EGR50387.1  | II  | 456 | Mitochondria |
|            |                                  | TrOYE5  | 568.1 | EGR44758.1  | III | 443 | Cytoplasm    |
|            |                                  | TrOYE6  | 422   | EGR52420.1  | III | 411 | Mitochondria |
|            |                                  | TrOYE7  | 358.8 | EGR50287.1  | III | 401 | Mitochondria |
|            |                                  |         |       |             |     |     |              |
| <b>58.</b> | <b><i>Trichoderma virens</i></b> | TvOYE1  | 365.0 | EHK21778.1  | I   | 346 | Cytoplasm    |
|            |                                  | TvOYE2  | 386.7 | EHK18275.1  | I   | 371 | Cytoskeleton |
|            |                                  | TvOYE3  | 357.1 | EHK24193.1  | I   | 360 | Mitochondria |
|            |                                  | TvOYE4  | 347.2 | EHK19405.1  | I   | 365 | Cytoskeleton |
|            |                                  | TvOYE5  | 362.6 | EHK23110.1  | I   | 383 | Mitochondria |
|            |                                  | TvOYE6  | 308.3 | EHK16730.1  | I   | 406 | Mitochondria |
|            |                                  | TvOYE7  | 413.4 | EHK26344.1  | II  | 416 | Cytoplasm    |
|            |                                  | TvOYE8  | 382.7 | EHK24541.1  | II  | 457 | Mitochondria |
|            |                                  | TvOYE9  | 366.6 | EHK19931.1  | II  | 454 | Mitochondria |
|            |                                  | TvOYE10 | 371.4 | EHK24097.1  | II  | 411 | Cytoskeleton |
|            |                                  | TvOYE11 | 556.3 | EHK19464.1  | III | 443 | Cytoplasm    |
|            |                                  | TvOYE12 | 406.2 | EHK20481.1  | III | 408 | Mitochondria |
|            |                                  | TvOYE13 | 431.4 | EHK24194.1  | III | 409 | Cytoskeleton |
|            |                                  | TvOYE14 | 357.7 | EHK20478.1  | III | 418 | Cytoplasm    |
|            |                                  |         |       |             |     |     |              |
| <b>59.</b> | <b><i>Ustilago hordei</i></b>    | UhOYE1  | 327.6 | CCF53752.1  | II  | 466 | Cytoplasm    |
|            |                                  | UhOYE2  | 431.9 | CCF53697.1  | III | 422 | Cytoplasm    |
|            |                                  | UhOYE3  | 275.8 | CCF53309.1  | III | 551 | Cytoplasm    |
|            |                                  |         |       |             |     |     |              |
| <b>60.</b> | <b><i>Ustilago maydis</i></b>    | UmOYE1  | 345.5 | XP_756193.1 | II  | 462 | Cytoplasm    |
|            |                                  | UmOYE2  | 430.4 | XP_756166.1 | III | 414 | Cytoplasm    |
|            |                                  | UmOYE3  | 295.5 | XP_758016.1 | III | 540 | Mitochondria |

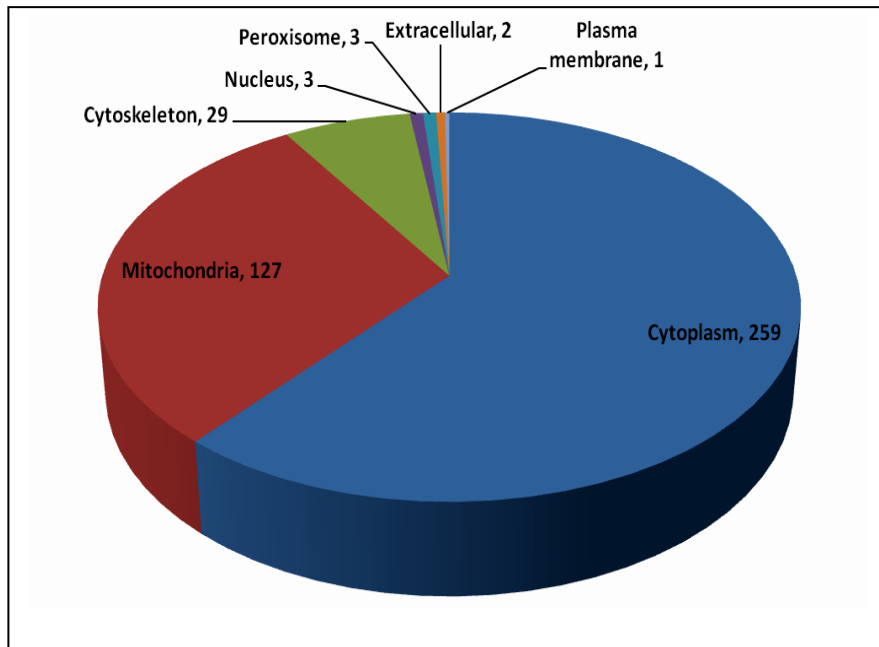

Supplementary Figure S1. Sub-cellular localization prediction of 424 fungal OYEs. Majority of the OYEs are predicted to be localized in cytoplasm, mitochondria and cytoskeleton.



A

PLTRFR

GYPNNVPGI

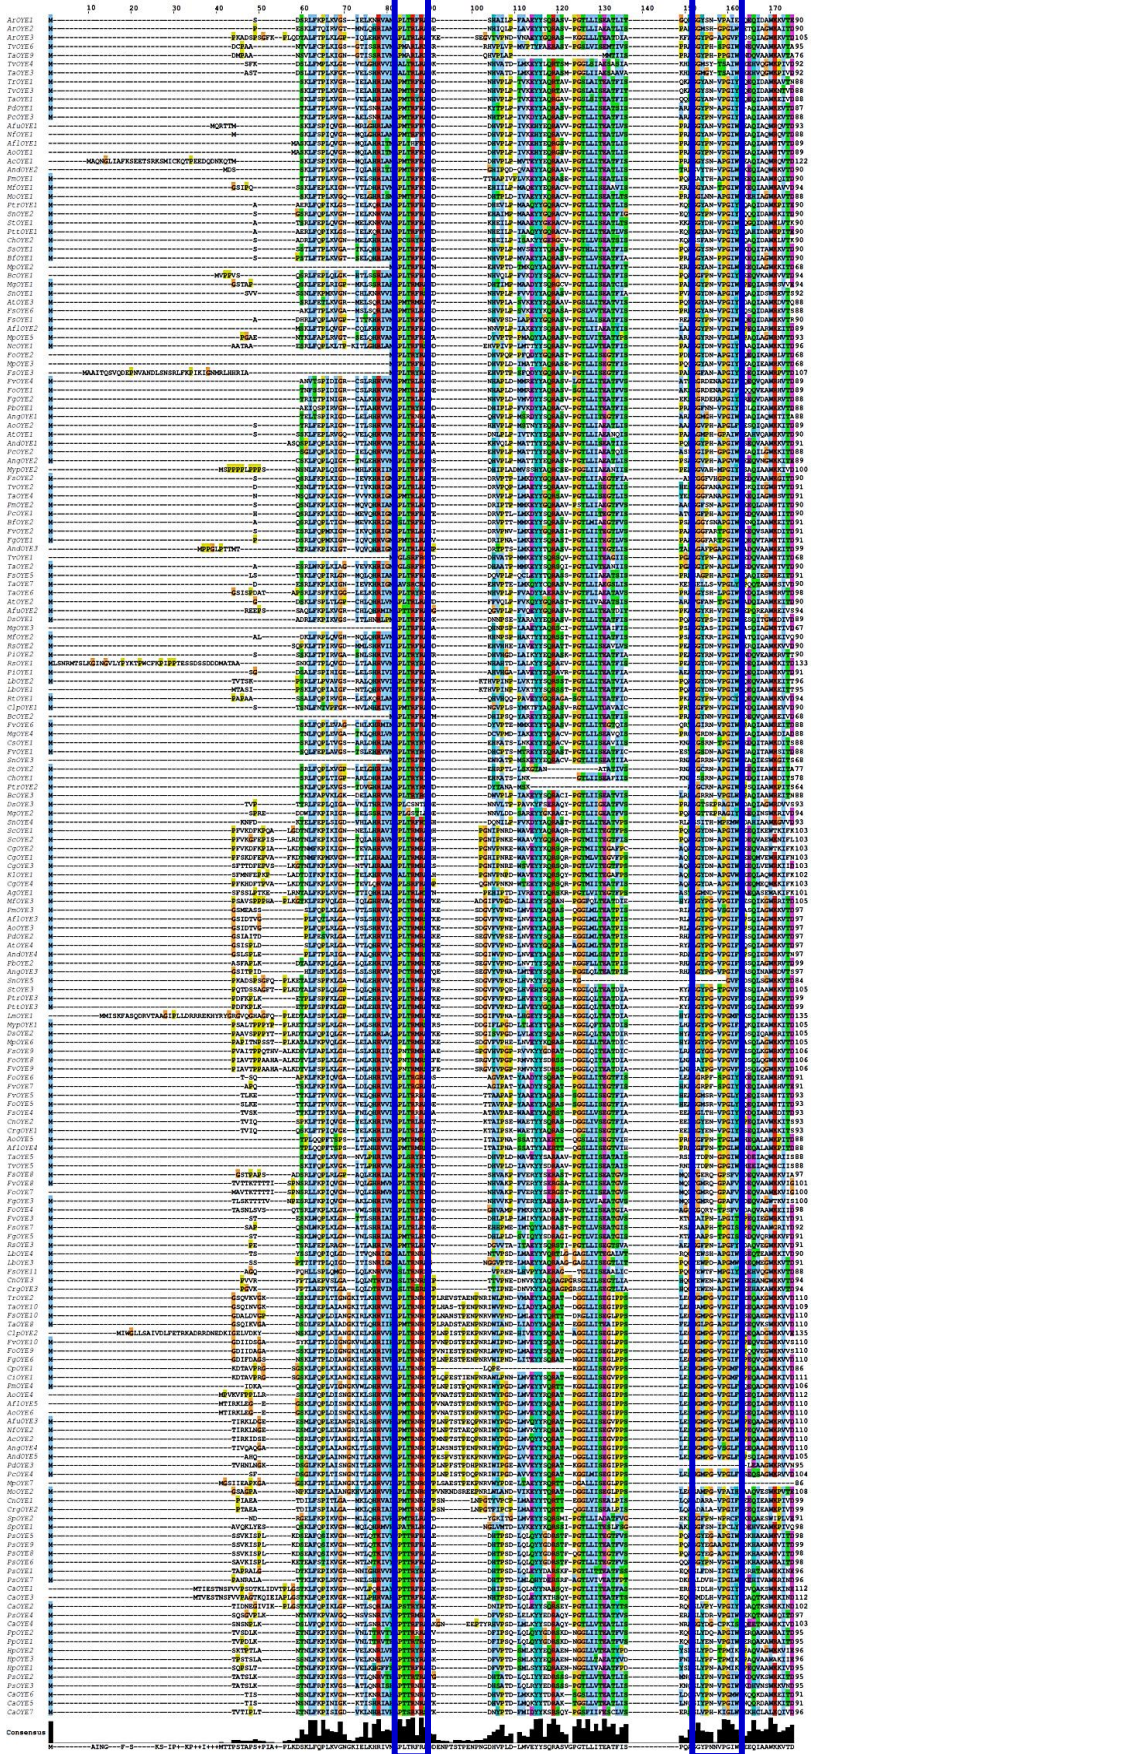

B

HGANG YGGS

Table with columns representing amino acid positions from 180 to 340. The table lists various protein sequences and their corresponding amino acid residues at each position. The residues are color-coded by type: blue for basic, red for acidic, green for polar, orange for non-polar, and grey for glycine. Two regions are highlighted with blue boxes: positions 299-302 and 308-311. The table ends with a color-coded bar at the bottom.

Table with columns representing amino acid positions from 310 to 340. This section continues the sequence data from the previous table, showing the residues for the final 30 positions. It also includes a color-coded bar at the bottom.

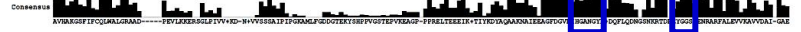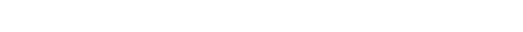



D

PMCQY

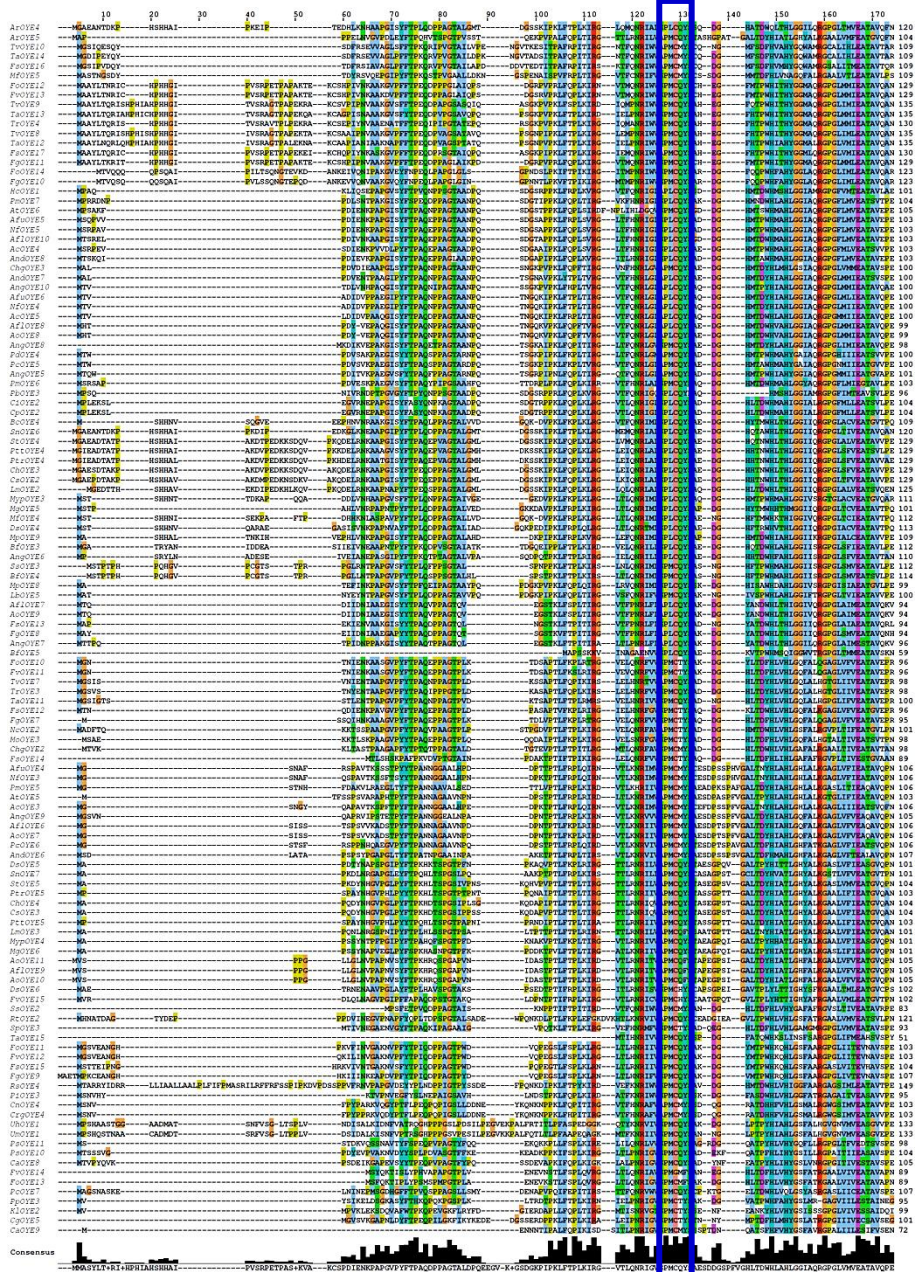

E

GRITPEDSGLW

HAGRK

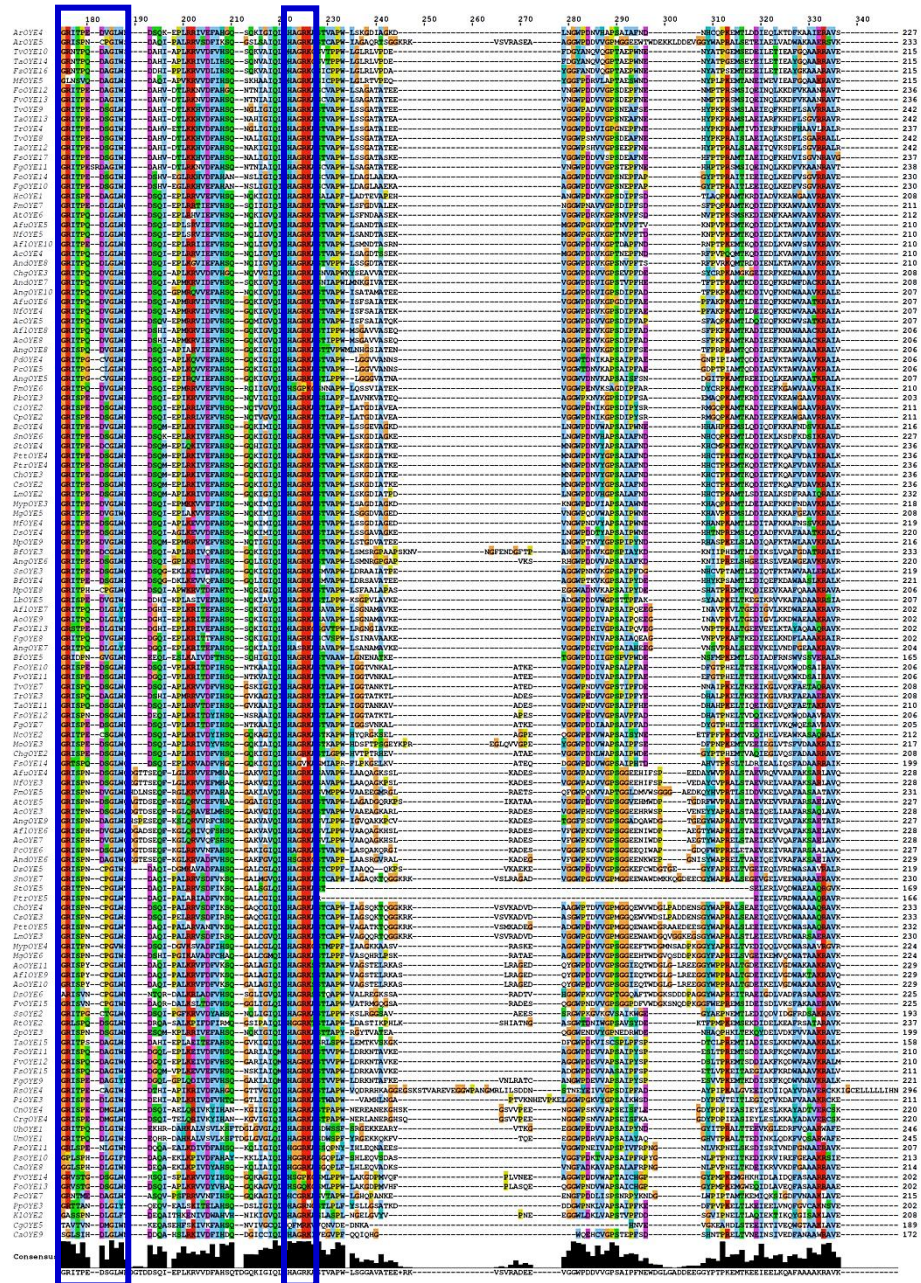



G

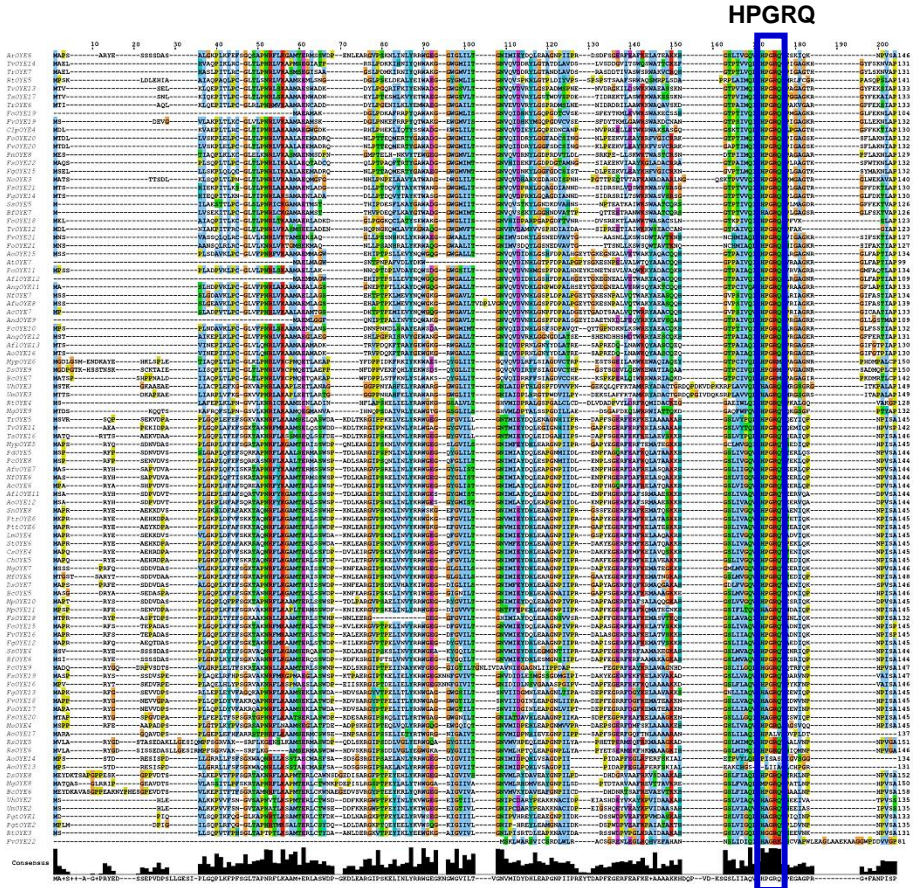

HPGRQ

H

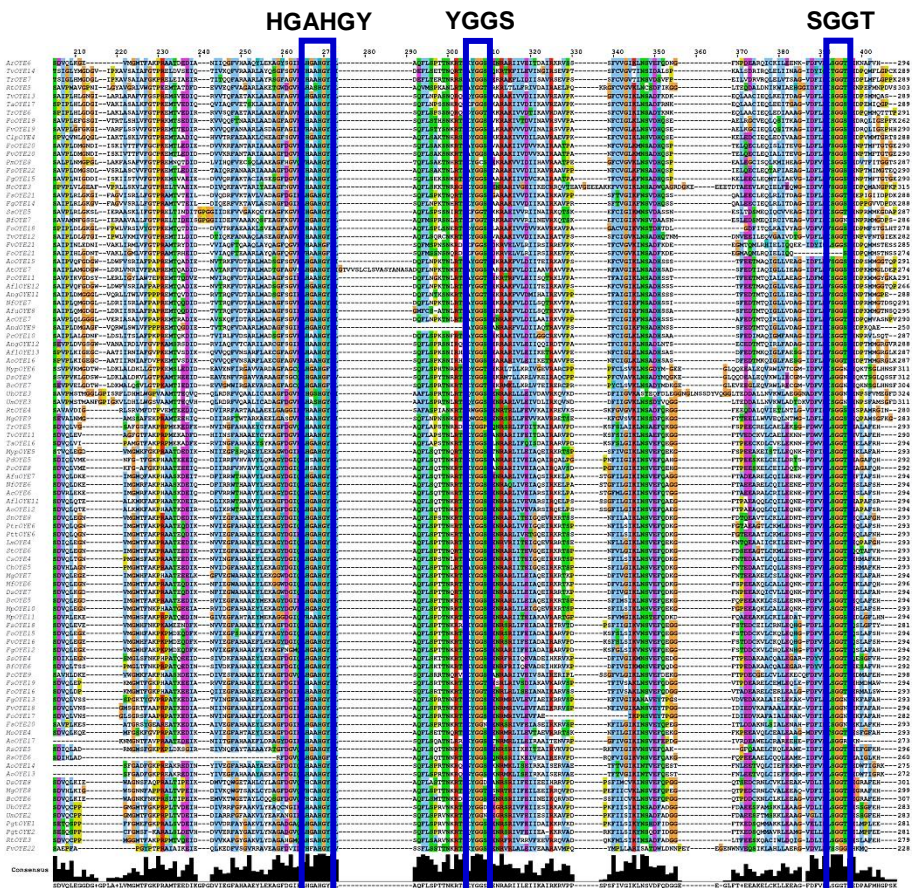

HGAHGY

YGGS

SGGT

Supplementary Figure S2. Class-wise multiple sequence alignment of full length OYE proteins from fungi. The alignment was generated with the PROMALS3D program using default parameters and visualized by Jalview 2.8 (Supplementary reference 1). (A), (B) and (C) Class I OYEs, (D) (E) and (F) Class II OYEs, and (G) and (H) Class III OYEs. The positions of the conserved active site residues and other class specific conserved motifs as described in text are highlighted with the rectangular boxes. The consensus sequence is displayed below the alignment.



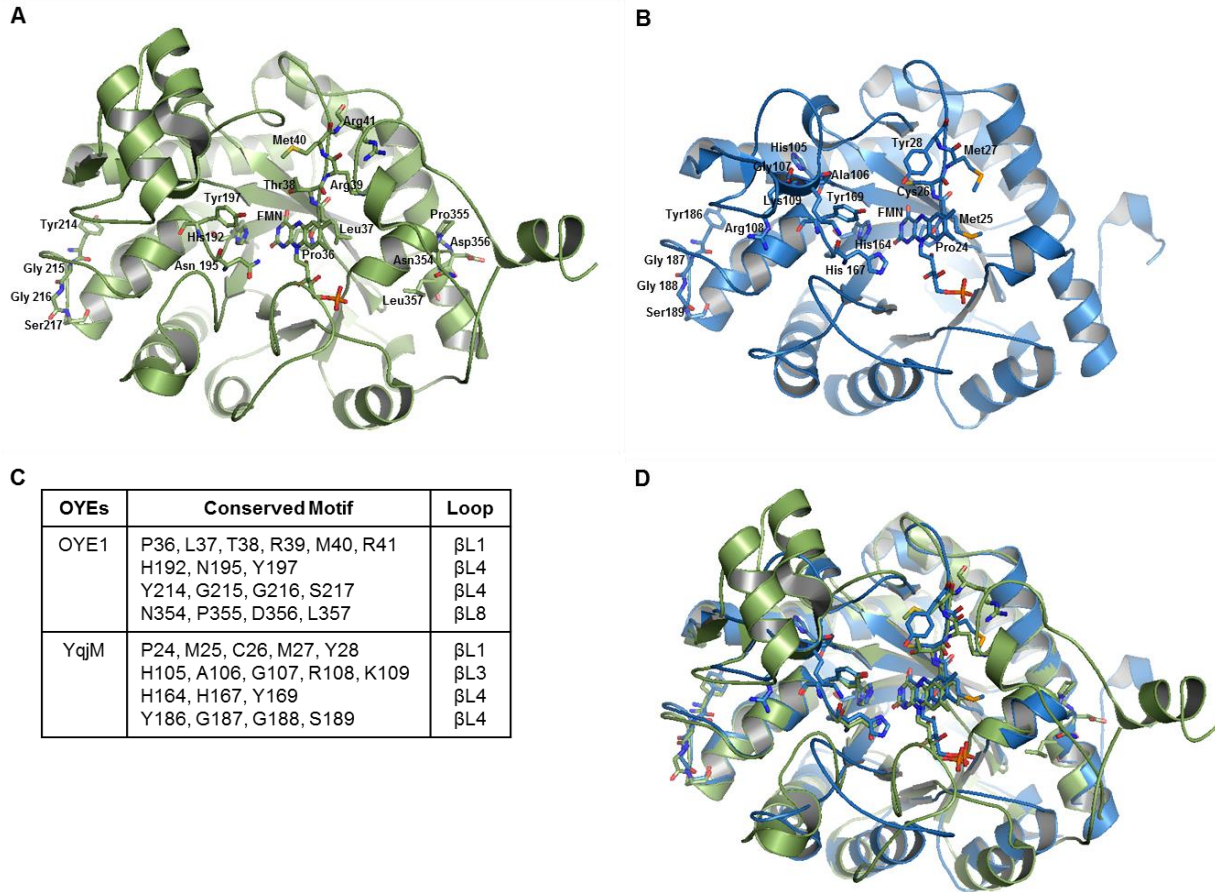

Supplementary Figure S3. Location of conserved motifs in the structures of typical OYEs. 3D structures of (A) yeast OYE1 (PDBID: 1OYB) representing Class I OYE and (B) YqjM (PDBID: 1Z42) representing Class II OYE were retrieved from the Protein Data Bank (PDB) and visualized using PyMOL ([www.pymol.org](http://www.pymol.org)). The cartoon representation shows the backbone of both proteins, whereas conserved amino acid residues along with the cofactor (FMN) are shown as sticks. (C) Table shows the location of these conserved motifs in the loop region of their respective 3D structures. (D) Superposition of the two structures (OYE1 = smudge green and YqjM = sky blue) with their respective conserved motifs.

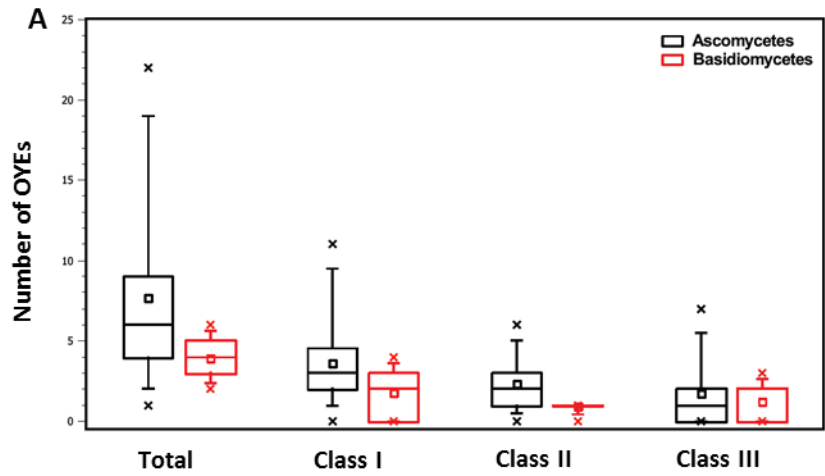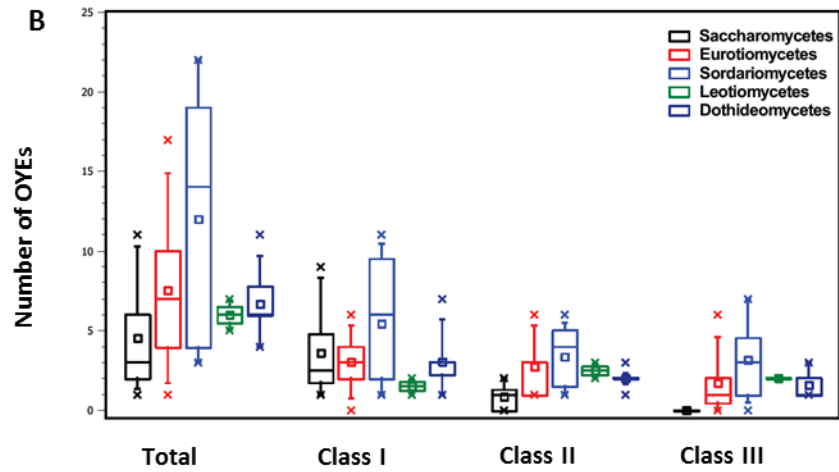

Supplementary Figure S4. Comparison of OYEs among fungi, (A) between ascomycetes (black) and basidiomycetes (red), and (B) among different classes of ascomycetes.

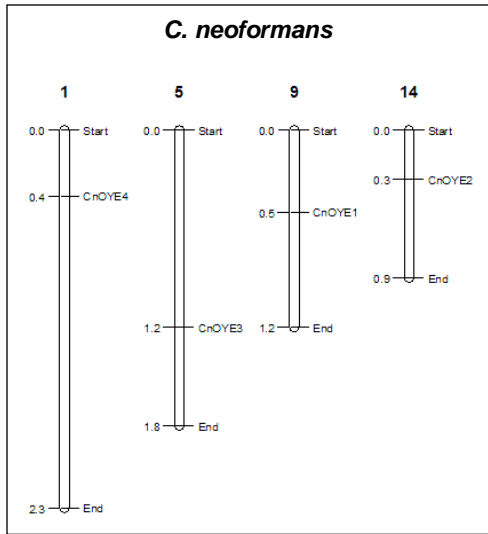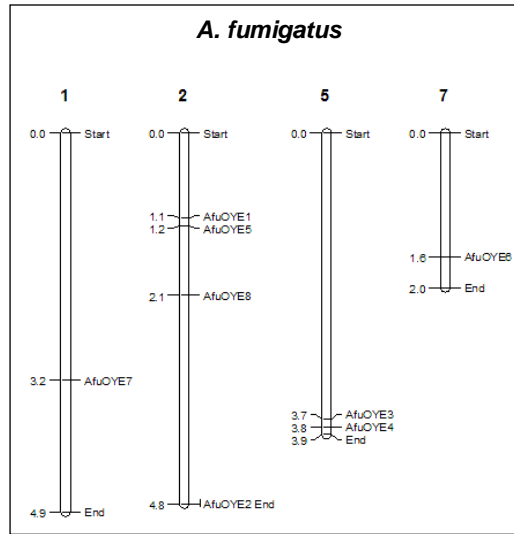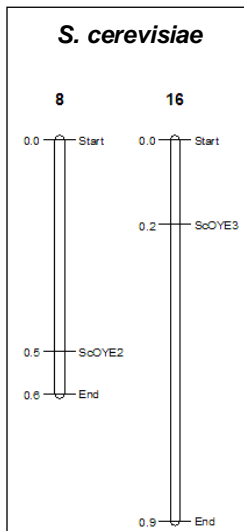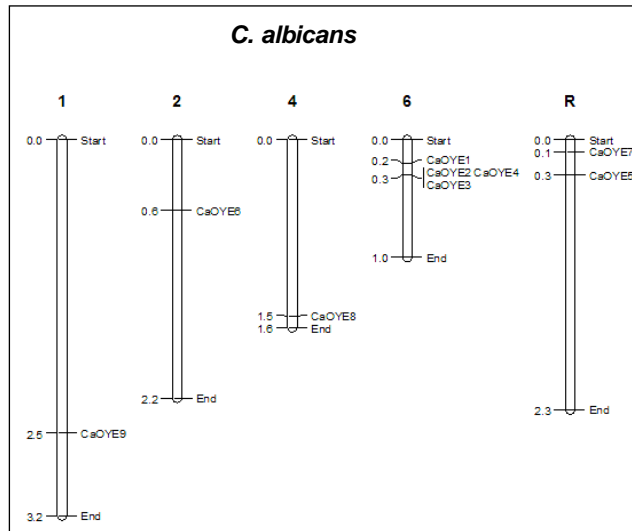

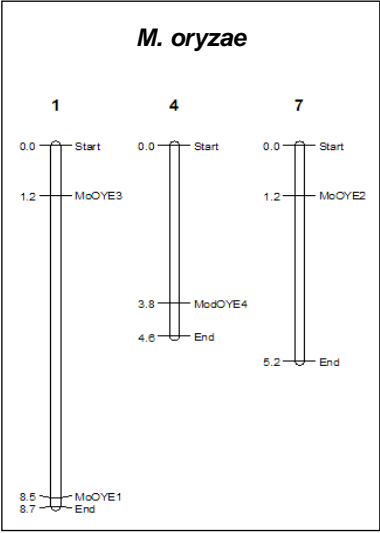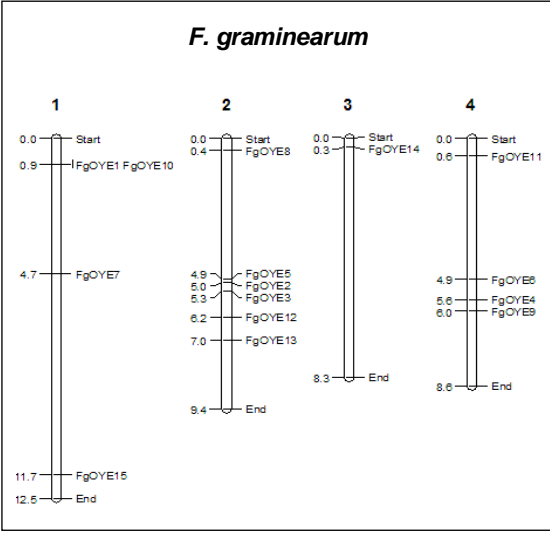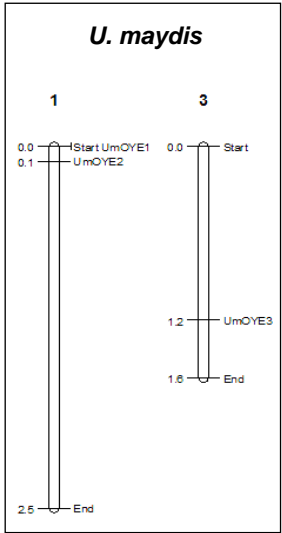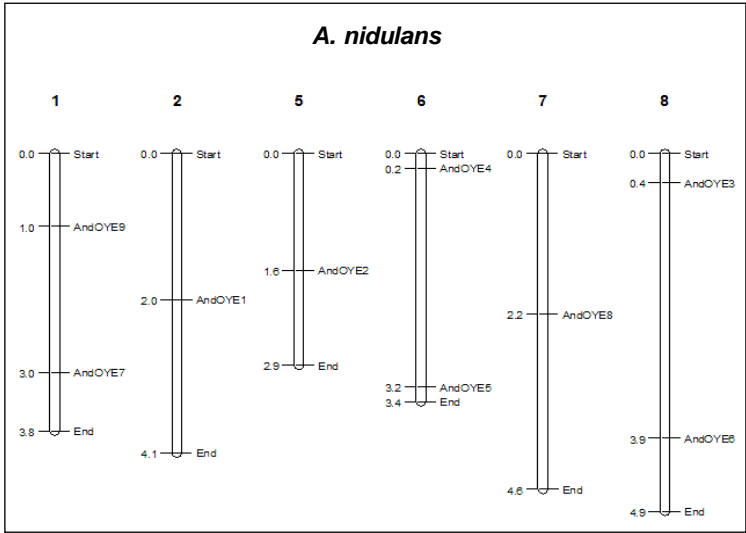

Supplementary Figure S5. Chromosomal distribution of *OYE* genes in few selected fungi. Physical locations of *OYE*s are represented on the respective chromosomes in eight different fungal species. On the top of each chromosome, the chromosome number is written. Values on the left side of the chromosome represent the position of the corresponding gene on the right side. Chromosomal distances are in Mb.

### Supplementary reference

1. Waterhouse, A.M., Procter, J.B., Martin, D.M.A, Clamp, M. & Barton, G. J. Jalview Version 2 – a multiple sequence alignment editor and analysis workbench. *Bioinformatics*. **9**, 1189-1191 (2009).
